# Supplementary material
Source: PubMed Central journal article supplement (PMC8281235)
Supplement: iai00685-20_supp_1_seq1.pdf [file iai00685-20_supp_1_seq1.pdf]

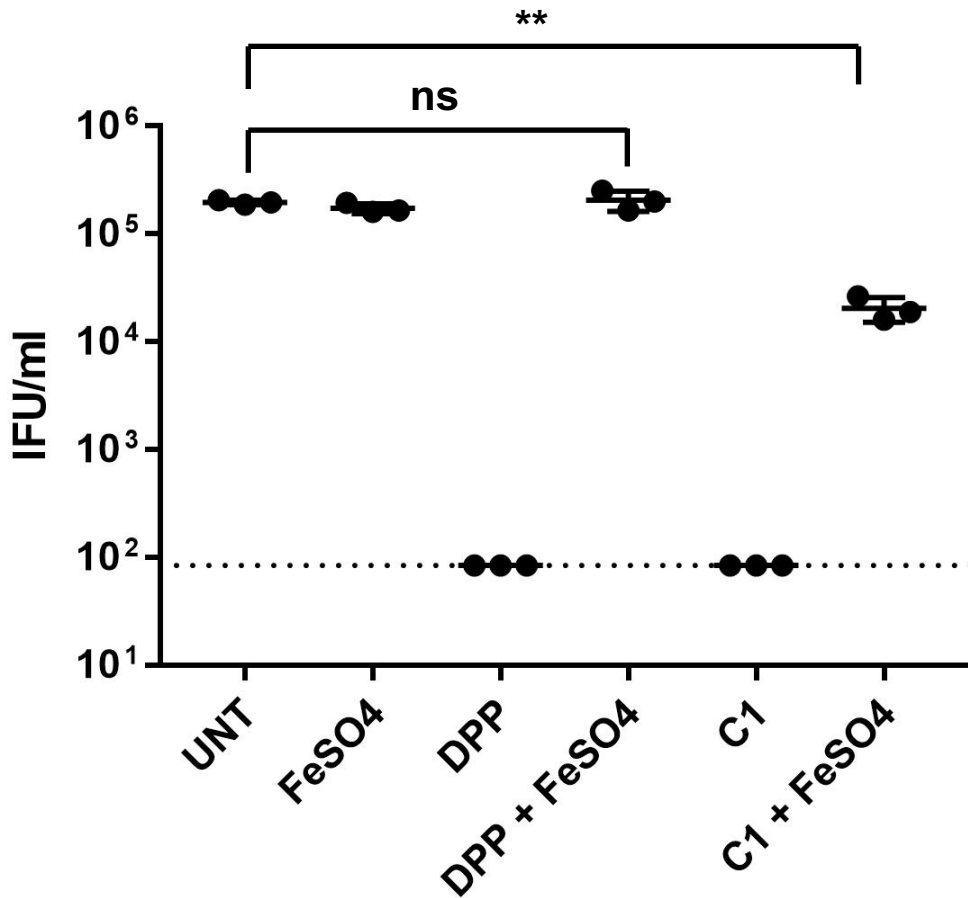

**Figure S1. The effects of T3SS inhibitor on the development of *C. trachomatis* are significantly reduced in cells supplemented with exogenous iron.** 0 or 250  $\mu\text{M}$   $\text{FeSO}_4$  was added to HeLa cells at the time of infection with *Chlamydia trachomatis*. At 2 hpi or 8 hpi, DPP or C1 (respectively) was added. EBs were harvested at 44 hpi. Inclusion forming units (IFU) were then calculated by conducting serial dilutions, infecting fresh monolayers, and counting new inclusions at 24 hpi. The dotted line represents the limit of detection for the assay. Data plotted represent three independent biological replicates and error bars represent the standard deviations from the mean. \*\*,  $p < 0.01$ .
