# Supplementary material
Source: PubMed Central journal article supplement (PMC8281235)
Supplement: iai00685-20_supp_3_seq3.pdf [file iai00685-20_supp_3_seq3.pdf]

**a**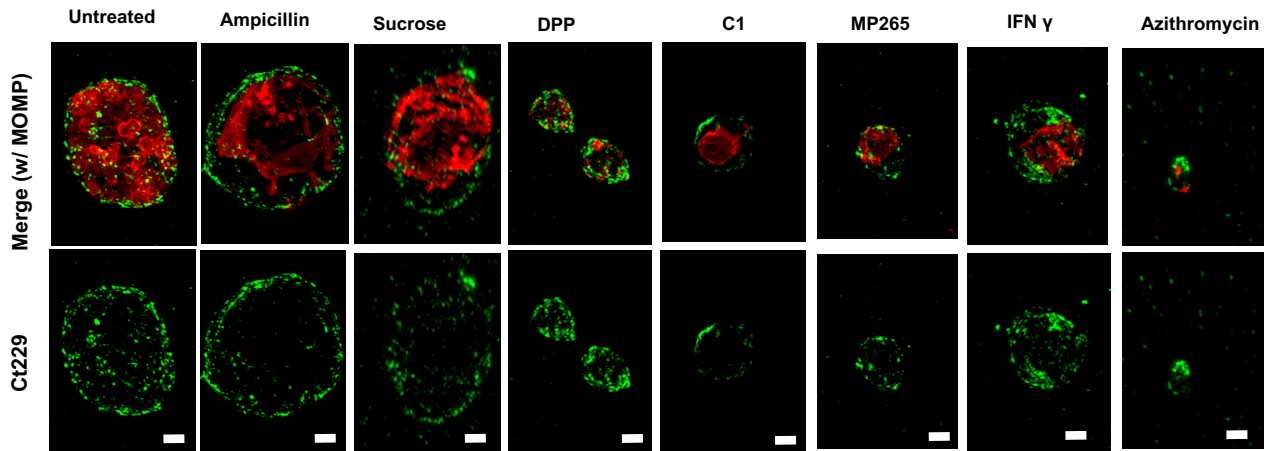**b**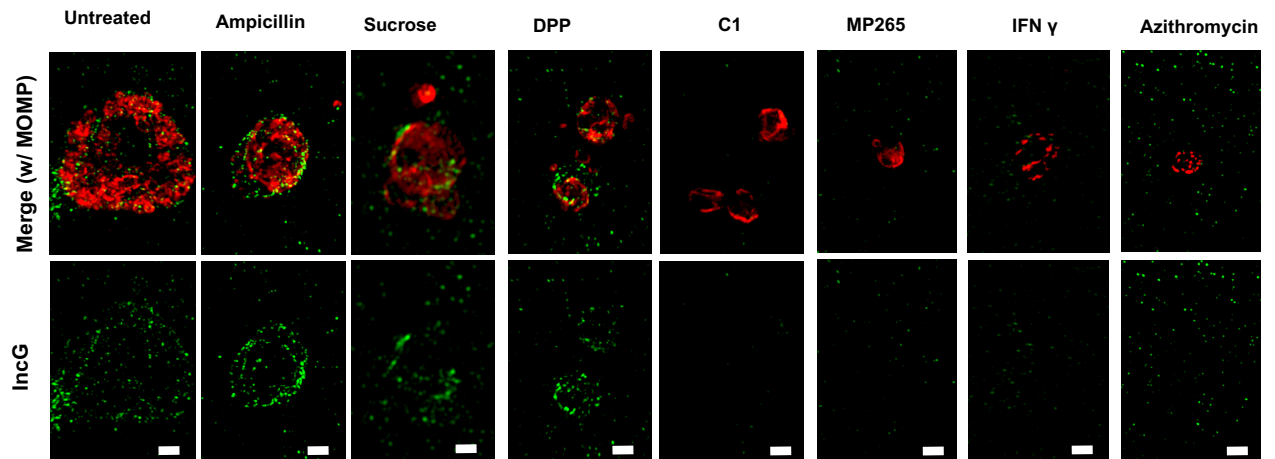

**Figure S3: *Chlamydia* ABs differ in their presentation of early-stage inclusion membrane proteins.** Immunolabeling of inclusion membrane proteins CT229 (a) and IncG (b) in *Chlamydia*-infected cells at 24 hours post infection. Inc presentation was compared for six different aberrance-inducing conditions. Cells treated with the protein synthesis inhibitor azithromycin at 8 hpi were used as a control. Scale bars; ~ 2  $\mu$ m.
